# Supplementary material for: Digitally Barcoding Mycobacterium tuberculosis Reveals In Vivo Infection Dynamics in the Macaque Model of Tuberculosis
Source: PubMed Central journal article supplement (PMC5424202; doi:10.1128/mbio.00312-17), 2017-05-09
Supplement: mbo002173302sf1.pdf [file mbo002173302sf1.pdf]

Supplementary Figure 1

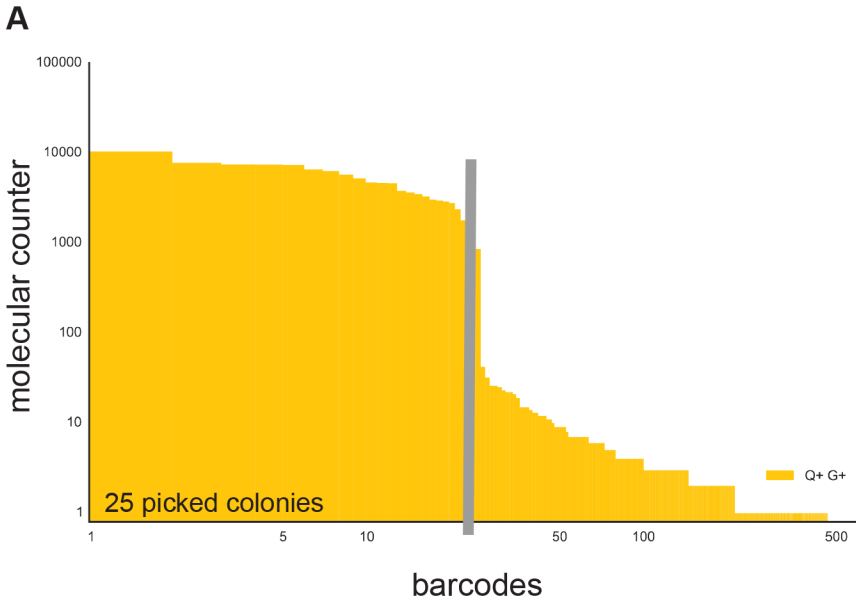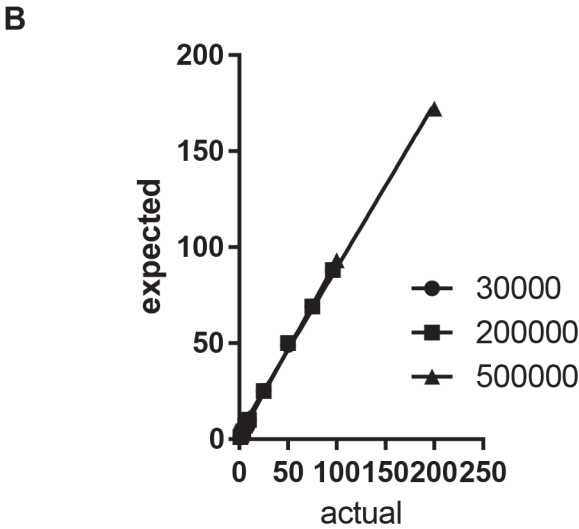

|            |        |        |        |
|------------|--------|--------|--------|
| read depth | 30000  | 200000 | 500000 |
| R square   | 0.9986 | 0.9981 | 0.9975 |
