# Supplementary material for: Digitally Barcoding Mycobacterium tuberculosis Reveals In Vivo Infection Dynamics in the Macaque Model of Tuberculosis
Source: PubMed Central journal article supplement (PMC5424202; doi:10.1128/mbio.00312-17), 2017-05-09

Supplementary Figure 3

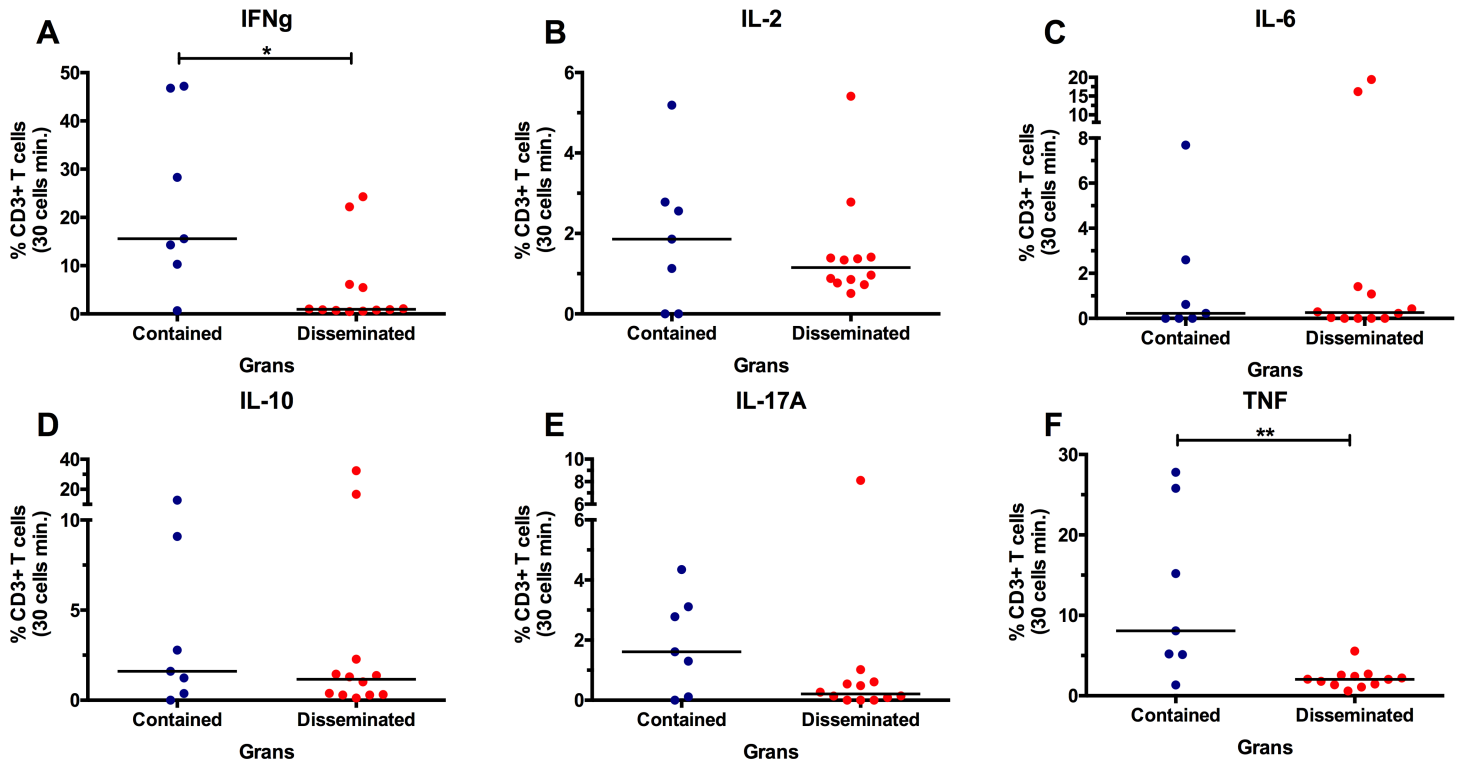

Supplement: mbo002173302sf3.pdf [file mbo002173302sf3.pdf]
