# Supplementary material for: Digitally Barcoding Mycobacterium tuberculosis Reveals In Vivo Infection Dynamics in the Macaque Model of Tuberculosis
Source: PubMed Central journal article supplement (PMC5424202; doi:10.1128/mbio.00312-17), 2017-05-09

Supplementary Figure 4

A.

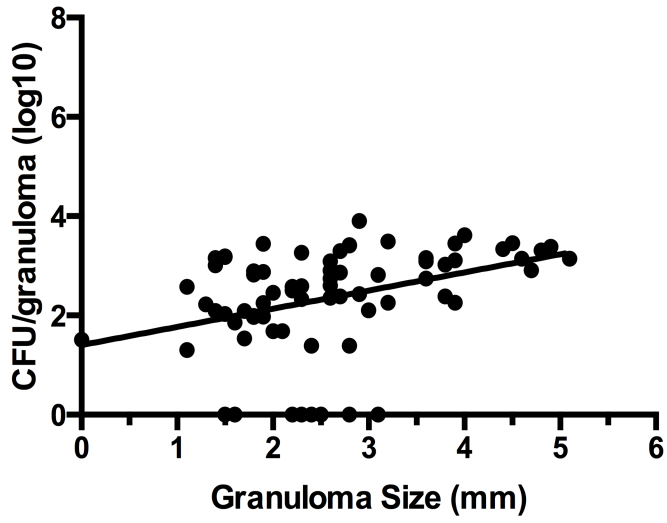

B.

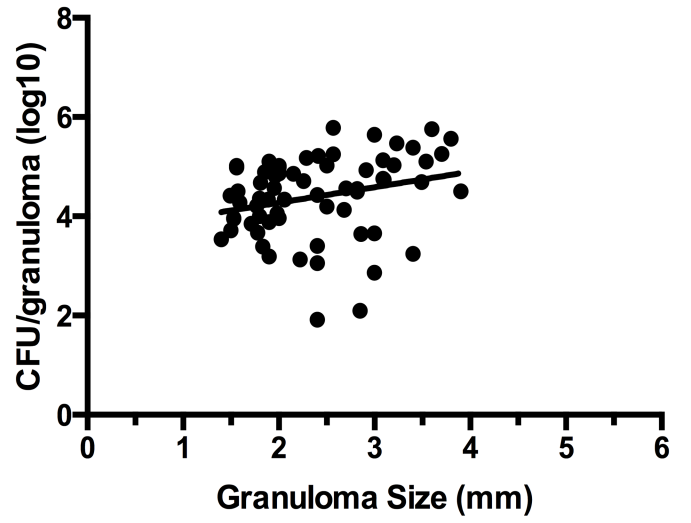

Supplement: mbo002173302sf4.pdf [file mbo002173302sf4.pdf]
