# Supplementary material for: Digitally Barcoding Mycobacterium tuberculosis Reveals In Vivo Infection Dynamics in the Macaque Model of Tuberculosis
Source: PubMed Central journal article supplement (PMC5424202; doi:10.1128/mbio.00312-17), 2017-05-09
Supplement: mbo002173302st1.pdf [file mbo002173302st1.pdf]

## Supplementary Table 1

**Name**      **Sequence**

### Barcode Generation Primers

CM29      GTACGAGGTACCCGANNNCNNNNaattcgatggcctagctgg  
CM30      GGCCTATCTAGAgaccacaacggtttccatag

### Illumina Library Primers

#### *step 1*

Ftotal1      CCCTACACGACGCTCTCCGATCTNCNNNCNNNCNNN  
Ftotal2      CCCTACACGACGCTCTCCGATCTNNCNNNCNNNCNNN  
Ftotal3      CCCTACACGACGCTCTCCGATCTNNNCNNNCNNNCNNN  
Ftotal4      CCCTACACGACGCTCTCCGATCTCNNNCNNNCNNN  
Rtotal1      GTGACTGGAGTTCAGACGTGTGCTCTTCCGATCNGAgaccacaacggtttccatag  
Rtotal2      GTGACTGGAGTTCAGACGTGTGCTCTTCCGATCNNNGAgaccacaacggtttccatag  
Rtotal3      GTGACTGGAGTTCAGACGTGTGCTCTTCCGATCNNNNGAgaccacaacggtttccatag  
Rtotal4      GTGACTGGAGTTCAGACGTGTGCTCTTCCGATCGAgaccacaacggtttccatag

#### *step 2*

F501      AATGATACGGCGACCACCGAGATCTACACTAT AGCCTACACTCTTCCCTACACGACGCTCTTCC  
F502      AATGATACGGCGACCACCGAGATCTACACATA GAGGCACACTCTTCCCTACACGACGCTCTTCC  
F503      AATGATACGGCGACCACCGAGATCTACACCCT ATCCTACACTCTTCCCTACACGACGCTCTTCC  
F504      AATGATACGGCGACCACCGAGATCTACACGGC TCTGAACACTCTTCCCTACACGACGCTCTTCC  
F505      AATGATACGGCGACCACCGAGATCTACACAGG CGAAGACACTCTTCCCTACACGACGCTCTTCC  
F506      AATGATACGGCGACCACCGAGATCTACACTAATCTTAACACTCTTCCCTACACGACGCTCTTCC  
F507      AATGATACGGCGACCACCGAGATCTACACCAGGACGTACACTCTTCCCTACACGACGCTCTTCC  
F508      AATGATACGGCGACCACCGAGATCTACACGTAAGTACTGACACTCTTCCCTACACGACGCTCTTCC  
R701      CAAGCAGAAGACGGCATAACGAGATCGAGTAATGTGACTGGAGTTCAGACGTGTGC  
R702      CAAGCAGAAGACGGCATAACGAGATTCTCCGAGTGACTGGAGTTCAGACGTGTGC  
R703      CAAGCAGAAGACGGCATAACGAGATAATGAGCGGTGACTGGAGTTCAGACGTGTGC  
R704      CAAGCAGAAGACGGCATAACGAGATGGAATCTCGTGACTGGAGTTCAGACGTGTGC  
R705      CAAGCAGAAGACGGCATAACGAGATTTCTGAATGTGACTGGAGTTCAGACGTGTGC  
R706      CAAGCAGAAGACGGCATAACGAGATACGAATTCGTGACTGGAGTTCAGACGTGTGC  
R707      CAAGCAGAAGACGGCATAACGAGATAGCTTCAGGTGACTGGAGTTCAGACGTGTGC  
R708      CAAGCAGAAGACGGCATAACGAGATGCGCATTAGTGACTGGAGTTCAGACGTGTGC  
R709      CAAGCAGAAGACGGCATAACGAGATCATAGCCGGTGACTGGAGTTCAGACGTGTGC  
R710      CAAGCAGAAGACGGCATAACGAGATTTGCGGAGTGACTGGAGTTCAGACGTGTGC  
R711      CAAGCAGAAGACGGCATAACGAGATGCGCGAGAGTGACTGGAGTTCAGACGTGTGC  
R712      CAAGCAGAAGACGGCATAACGAGATCTATCGCTGTGACTGGAGTTCAGACGTGTGC
